# Supplementary material for: Enhanced C–C coupling of Cu-based catalysts via zirconia-driven carbonate interaction for electrochemical CO 2 reduction reaction
Source: Royal Society of Chemistry journal article supplement (doi:10.1039/d4ta04707a), 2024-01-01
Supplement: d4ta04707a1.pdf [file d4ta04707a1.pdf]

ARTICLE

## Enhanced C-C coupling of Cu-based catalysts via zirconia-driven carbonate interaction for electrochemical CO<sub>2</sub> reduction reaction

Received 00th January 20xx,  
Accepted 00th January 20xx

Dayeon Kim <sup>a</sup>, Hyewon Yun <sup>a,b</sup>, Jiseon Kim <sup>a,b</sup>, Chan Woo Lee <sup>c</sup>, and Yun Jeong Hwang\* <sup>a,b</sup>

DOI: 10.1039/x0xx00000x

Electrochemical CO<sub>2</sub> reduction (ECR) using Cu-based catalysts is a promising approach to producing C<sub>2+</sub> chemicals such as C<sub>2</sub>H<sub>4</sub> for sustainable carbon capture and utilization. Recent research has explored improving Cu catalyst performances through modifications, including integrating with other metal oxides. Here, we report that incorporating amorphous zirconia adjacent to copper oxide (CuO/ZrO<sub>x</sub>) significantly improves its ECR performance in a membrane electrode assembly (MEA) electrolyzer. The CuO/ZrO<sub>x</sub> catalyst exhibited a higher CO<sub>2</sub> adsorption capacity and increased current density for C<sub>2+</sub> production compared to bare CuO. Specifically, the ethylene partial current density increased by 1.76 times. *Operando* X-ray absorption spectroscopy measurements reveal the evolution of the zirconia-carbonate interaction during ECR in the MEA, whereas the Cu state is reduced to the metallic state, irrespective of ZrO<sub>2</sub> presence. Post-reaction analysis shows that the modulation in the binding environment of Cu is associated with an increased oxidation state of Cu along with the enhanced interaction of CuO/ZrO<sub>x</sub> with carbonate. These distinct properties support the role of zirconia in enhancing CO<sub>2</sub> affinity and mediating the reactant feed to the Cu-based catalyst surface.

### Introduction

Electrochemical CO<sub>2</sub> conversion has been proposed as a sustainable carbon capture and utilization (CCU) method for carbon neutrality because of the advantage of using water as a proton supply.<sup>1,2</sup> The electrochemical CO<sub>2</sub> reduction reaction (ECR) enables the synthesis of various value-added chemicals at room temperature. C<sub>2+</sub> chemicals including ethylene (C<sub>2</sub>H<sub>4</sub>) have been targeted, considering their large global market sizes and high prices.<sup>1,2</sup> Therefore, research has been extensively conducted to enhance C<sub>2+</sub> production by investigating electrocatalysts, electrolytes, and electrolyzers.<sup>3-5</sup> Cu has been the most extensively studied element for C<sub>2</sub>H<sub>4</sub> production due to its suitable intermediate binding energies for both \*CO stabilization and C-C coupling reactions compared to other metal elements.<sup>6,7</sup> It has been demonstrated that oxide-derived Cu-based catalysts exhibit outstanding performance for C-C coupling compared to bare Cu catalysts.<sup>8-10</sup> More recent studies have reported that introducing add-layer components on the Cu-based catalyst surface can enhance C<sub>2+</sub> production by adjusting the electronic state of the Cu or the local pH.<sup>11</sup> However, challenges such as suppressing the hydrogen evolution reaction (HER) or obtaining higher selectivity over C<sub>1</sub>

chemicals such as CO or formate, still require improvement of the catalyst performance through the integration with other materials.<sup>1,2</sup>

The ECR occurs at the tri-phase interface, consisting of gaseous CO<sub>2</sub> reactants, liquid aqueous electrolytes, and solid catalyst surfaces. In a membrane electrode assembly (MEA) electrolyzer combined with a gas diffusion electrode (GDE), the catalyst on the cathode compartment can be directly supplied by gas-fed CO<sub>2</sub>, resulting in ECR performance improvements due to the increased CO<sub>2</sub> availability to the catalyst surface.<sup>12</sup> However, in the anion exchange membrane (AEM) environment commonly used in MEA devices, an increase in local pH due to the formation of hydroxide ions (OH<sup>-</sup>) during ECR leads to the conversion of CO<sub>2</sub> to (bi)carbonate, resulting in carbon loss and limiting CO<sub>2</sub> conversion efficiency.<sup>13</sup> This issue is exacerbated at higher current densities due to increased carbonate formation near the catalyst electrode, necessitating the development of suitable electrodes to work in these locally alkaline environments.<sup>13</sup> Strategies to develop suitable electrodes are done by introducing secondary components, such as organic moieties, polymers, and metal oxides, onto the catalyst surface which has been demonstrated to enhance the interaction with CO<sub>2</sub> molecules. The additional components can assist the catalytic active sites by multiple factors such as adjusting CO<sub>2</sub> adsorption, oxidation state of Cu, local pH, hydrophobicity, etc.

In particular, metal oxides have been widely utilized to modulate the electronic state and thus the catalytic activity for various reactions.<sup>14-16</sup> Metal oxides such as CeO<sub>2</sub>, SiO<sub>2</sub>, and Al<sub>2</sub>O<sub>3</sub>, which act as Lewis acids, can improve ECR selectivity by forming interfaces with the Cu-based catalyst.<sup>11,14</sup> The metal oxide is proposed to adjust the oxidation state of Cu or the

<sup>a</sup> Department of Chemistry, Seoul National University, Seoul 08826, Republic of Korea

<sup>b</sup> Center for Nanoparticle Research, Institute for Basic Science (IBS), Seoul 08826, Republic of Korea

<sup>c</sup> Department of Chemistry, Kookmin University, Seoul 02707, Republic of Korea

\* Correspondence: yjhwang1@snu.ac.kr

Supplementary Information available: [details of any supplementary information available should be included here]. See DOI: 10.1039/x0xx00000x

adsorption energy of CO<sub>2</sub> molecules or intermediates. Meanwhile, other contributions by metal oxide can be considered. Metal oxides such as MgO and ZrO<sub>2</sub> acting as Lewis bases have been developed as absorbents for CO<sub>2</sub>, which directly facilitates the binding of CO<sub>2</sub> or carbonate.<sup>16</sup> To achieve conversion beyond capturing CO<sub>2</sub>, reversible adsorption and desorption of CO<sub>2</sub> must occur. CO<sub>2</sub> binds to ZrO<sub>2</sub> with moderate strength compared to other metal oxides, allowing CO<sub>2</sub> desorption at room temperature.<sup>17</sup> Additionally, ZrO<sub>2</sub> exhibits high chemical stability, ensuring stability across a wide pH range and providing excellent cyclability.<sup>18</sup> ZrO<sub>2</sub>, known to act as both Lewis acid and base, has been suggested to enhance CO<sub>2</sub> activation and thermochemical conversion performance when combined with copper catalysts.<sup>19</sup> Similarly, ZrO<sub>2</sub> may support the local supply of reactants to the active sites of Cu during the ECR. These research efforts highlight the interest in integrating metal oxides into ECR catalysts, and further studies are needed to understand their contribution to C-C coupling, especially when used with Cu catalysts.

Here, we demonstrate that introducing ZrO<sub>2</sub> into CuO can enhance the ECR performance of C<sub>2+</sub> chemical production. Specifically, we observed a significant improvement in current density when amorphous ZrO<sub>2</sub> is present in a gas-fed GDE-based MEA environment compared to bare CuO. *In-situ/operando* X-ray absorption spectroscopy results pointed out that the electronic states of Zr interacted with carbonates, while Cu remained in a similar metallic state regardless of the presence of ZrO<sub>2</sub> during the ECR process at the MEA electrolyzer. This suggests that ZrO<sub>2</sub> aids in CO<sub>2</sub> activation and effectively has a carbonate form, which contributes to the supply of reactant to the catalyst surface. Post-reaction analysis of the CuO/ZrO<sub>x</sub> indicates an increased carbonate signal, a noticeable increase in the distribution of Cu<sup>2+</sup> species, and changes in the bonding environment of Cu compared to the CuO, supporting the carbonate-mediated chemical interaction at the interface. Our study demonstrates that incorporating metal oxides can increase the ECR performance mediated by carbonate interaction, which can be utilized to design efficient catalysts for electrochemical CO<sub>2</sub> conversion.

## Experimental

### Materials

Copper(II) nitrate trihydrate (Cu(NO<sub>3</sub>)<sub>2</sub> · 3H<sub>2</sub>O, puriss. p.a., 99–104%), sodium hydroxide (NaOH, ACS reagent, ≥97.0%, pellets), sodium carbonate (Na<sub>2</sub>CO<sub>3</sub>, powder, ≥99.5%, ACS reagent), zirconium(IV) carbonate hydroxide oxide (≥40% ZrO<sub>2</sub> basis), copper(II) oxide (CuO, nanopowder), copper(I) oxide (Cu<sub>2</sub>O, nanopowder), potassium bicarbonate (KHCO<sub>3</sub>, ≥99.95%), isopropanol (IPA, ACS reagent ≥99.5%), Nafion™ ionomer (~5% in a mixture of lower aliphatic alcohols and water) were purchased from Sigma Aldrich. Zirconium dinitrate oxide hydrate (ZrO(NO<sub>3</sub>)<sub>2</sub> · xH<sub>2</sub>O, 99.9%, metals basis), iridium(IV) oxide (IrO<sub>2</sub>, Premion®, 99.99%) were purchased from Alfa Aesar. Ethanol (99.9%) was purchased from Samchun Chemicals (Korea). Platinized titanium screen mesh and gas diffusion

layers (GDL, Sigracet 39 BB, SGL Carbon) were purchased from the Fuel Cell Store. The spray gun (Gunpiece GP-2) was purchased from Fuso Seiki. MEA-type CO<sub>2</sub> electrolyzer (5 cm<sup>2</sup> scale) and Sustainion® X37-50 Grade RT membrane were purchased from Dioxide Materials.

### Catalyst synthesis

For the synthesis of CuO/ZrO<sub>x</sub>, 0.4832 g of Cu(NO<sub>3</sub>)<sub>2</sub> · 3H<sub>2</sub>O was dissolved into 10 mL of water, and 10 mL of 0.5 M NaOH solution was added dropwise under vigorous stirring. After stirring for 30 min, 2 mL of 0.2 M ZrO(NO<sub>3</sub>)<sub>2</sub> solution was injected into the solution. After stirring for 10 min, 20 mL of 0.1 M Na<sub>2</sub>CO<sub>3</sub> was injected into the solution for the precipitation. After stirring for 20 min, the product was washed three times with IPA (centrifuge, 8000 rpm, 10 min, 15 °C). The product was dried under vacuum at room temperature overnight. The blue powder after drying was calcinated at 200 °C with a ramping rate of 10 °C/min and maintained for 1 hr under the Ar atmosphere. CuO, CuZrO-0.5, and CuZrO-2 catalysts were synthesized by following a similar procedure described above, except the amounts of zirconium precursor and Na<sub>2</sub>CO<sub>3</sub>. 0 mL, 1 mL, and 4 mL of 0.2 M ZrO(NO<sub>3</sub>)<sub>2</sub> solution were added to form CuO, CuZrO-0.5, and CuZrO-2, respectively. Also, 20 mL, 10 mL, and 40 mL of 0.1 M Na<sub>2</sub>CO<sub>3</sub> solution were added to form CuO, CuZrO-0.5, and CuZrO-2, respectively.

### Material Characterization

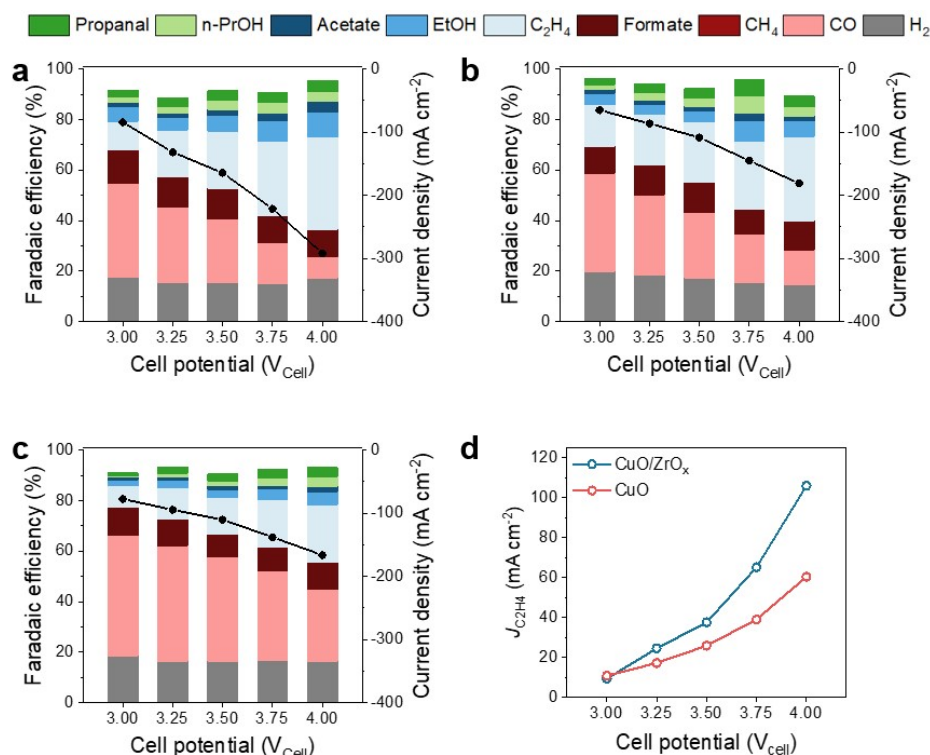

**Fig. 1** ECR performance of CuO/ZrO<sub>x</sub> and CuO catalysts in MEA electrolyzer with 0.1 M KHCO<sub>3</sub> electrolyte. (a) The FEs for products and total current densities on CuO/ZrO<sub>x</sub>, (b) CuO, and (c) physically mixed CuO+ZrO<sub>x</sub> catalysts at different cathodic potentials. (d) Comparison of the partial current densities for C<sub>2</sub>H<sub>4</sub> on CuO/ZrO<sub>x</sub> and CuO catalysts.

To take the morphological and elemental analysis over the synthesized particles, a transmission electron microscope (TEM; JEM-F200(TFEG)) operating at 200 kV and a Cs-scanning transmission electron microscope (STEM; JEM-ARM200F) operating at 200 kV were employed. High-resolution transmission electron microscopy (HRTEM) images, selected area electron diffraction patterns, high-angle annular dark-field (HAADF) images, and energy dispersive spectroscopy (EDS) mapping images were also obtained. To identify the crystal structure of each catalyst, X-ray diffraction (XRD) analysis was performed using Bruker D8-Advance with Cu target ( $\lambda = 1.54056 \text{ \AA}$ ) at room temperature. The inductively coupled plasma optical emission spectroscopy (ICP-OES; Agilent ICP5800) system was employed to analyze the elemental contents of the catalysts. To confirm the surface oxidation state of components, X-ray photoelectron spectroscopy (XPS) analysis was conducted by Thermo Electron Corporation K-ALPHA +, using Al K $\alpha$  X-ray radiation (1486.6 eV) for excitation. Fourier transform infrared (FT-IR) spectra were obtained with Bruker TENSOR27 equipped with a high sensitivity of deuterated L-alanine-doped triglycine sulfate (DLATGS) detector and using a high energy air-cooled mid-infrared glower source as the IR source. X-ray absorption spectroscopy (XAS) measurements at Cu K-edge and Zr K-edge were performed for *ex-situ* and *in-situ/operando* analysis at the 10C beamline of Pohang Acceleration Laboratory (PAL) in South Korea. To analyze the obtained data from XAS, the Athena software was used. The extended X-ray absorption fine structure (EXAFS) spectrum was transformed using the Kasier-Bessel function. Morlet wavelet transform EXAFS data were analyzed using MATLAB software.

### Electrochemical CO<sub>2</sub> reduction reaction performance

To measure the electrochemical CO<sub>2</sub> reduction performance of the catalysts, a zero-gap MEA-type CO<sub>2</sub> electrolyzer was used. The cathode was fabricated by spraying 0.5 mg cm<sup>-2</sup> of ink onto the GDE carbon paper (Sigracet 39BB). The cathode ink was prepared by mixing 6.0 mg of catalyst with 1 mL of IPA and 60  $\mu$ L of Nafion ionomer, followed by sonication for 30 min. The anode was fabricated by spraying IrO<sub>2</sub> ink onto platinumized Ti mesh. The IrO<sub>2</sub> ink was prepared by mixing 30 mg of IrO<sub>2</sub> with 1 mL of IPA and 300  $\mu$ L of Nafion ionomer, followed by sonication for 30 min. The prepared cathode was used as the working electrode and the anode was used as the counter electrode separated by an AEM (Sustainion membrane). This experiment utilized a 2-electrode system, and the cell potential was applied using a potentiostat (Ivium potentiostat). During the ECR measurement, high-purity CO<sub>2</sub> gas (99.999%) continuously passed through a humidifier to attain 100 % relative humidity and flowed over the cathode electrode at a flow rate of 100 sccm. Meanwhile, 0.1 M KHCO<sub>3</sub> electrolyte was circulated over the anode electrode at 17 rpm using a peristaltic pump. The gas products were analyzed using gas chromatography (GC, Agilent), and the liquid products were quantified using <sup>1</sup>H-nuclear magnetic resonance spectroscopy (NMR, 500MHz Bruker). The GC was equipped with a Carboxen 1000 column (Supelco), and high-purity Ar gas was used as the carrier gas. The gas product was injected into the GC every 15 min, where H<sub>2</sub> and CO were detected using a thermal conductivity detector (TCD), and CH<sub>4</sub> and C<sub>2</sub>H<sub>4</sub> were detected using a flame ionization detector (FID). For liquid products, 1 mL of anolyte was sampled every 15 min. From each sample, 450  $\mu$ L was taken and mixed

with 50  $\mu\text{L}$  of an internal standard solution. The standard solution consisted of dimethyl sulfoxide (DMSO) and phenol in  $\text{D}_2\text{O}$ . Ethanol, acetate, n-propanol, and propanal were quantified based on their intensity relative to the DMSO peak, while formate was quantified based on its intensity relative to the phenol peak. The Faradaic efficiency (FE) of each gas product was calculated using the equation.

$$FE_{\text{product } i} = x_i \times v \times \frac{z_i F P_0}{RT} \times \frac{1}{I_{\text{total}}} \times 100\%$$

where  $x_i$  represents the volume fraction of product  $i$ ,  $v$  represents the flow rate of  $\text{CO}_2$  gas, and  $z_i$  is the number of electrons consumed when  $\text{CO}_2$  is reduced to product  $i$ .  $F$  is the Faradaic constant,  $P_0$  is the pressure, 101325 Pa.  $R$  is the ideal gas constant,  $T$  is the temperature, and  $I_{\text{total}}$  is the measured total current. The FE of each liquid product was calculated using the equation below, where  $n_i$  is the produced amount (mole) of the liquid product  $i$  that is quantified by NMR analysis, and  $Q$  is the total passed charged during the ECR.

$$FE_{\text{product } i} = \frac{z_i F}{Q} \times 100\%$$

### Operando X-ray absorption Spectroscopy in MEA

For *in-situ/operando* XAS analysis in MEA, a custom-made MEA electrolyzer was utilized. To obtain the signal at the fluorescence mode during ECR, the *operando* MEA cell had a window on the cathode side sealed with Kapton tape to allow the X-ray incident beam to pass through. The electrode preparation conditions, electrolyte, gas flow rate, and liquid flow rate were the same as for the ECR performance measurements. XAS analysis was performed under open circuit potential (OCP), 3 V of the cell voltage ( $3 V_{\text{cell}}$ ), and post-ECR conditions for Cu K-edge and Zr K-edge, respectively. Commercial  $\text{CuO}$ ,  $\text{Cu}_2\text{O}$ , Cu foil, and synthesized  $\text{Cu}(\text{OH})_2$  were used as Cu references, and commercial  $\text{Zr}(\text{OH})_2\text{CO}_3 \cdot \text{ZrO}_2$ ,  $\text{ZrO}_2$ , and Zr foil were used as Zr references.

## Results and discussion

### ECR measurement in MEA

To determine whether introducing zirconia ( $\text{ZrO}_x$ ) contributes to ECR using Cu-based catalysts, we prepared  $\text{CuO}/\text{ZrO}_x$  catalysts and compared their performance through product analysis at various operating potentials (Figure 1). To investigate whether  $\text{ZrO}_x$  modulates the C-C coupling activity, oxide-derived Cu catalysts were incorporated with  $\text{ZrO}_x$ , and ECR performances were measured in the MEA electrolyzer.  $\text{CuO}$ ,  $\text{CuO}/\text{ZrO}_x$ , and  $\text{ZrO}_x$  were synthesized following the procedure in Scheme S1, with catalyst characterization discussed later. For performance comparison, a carbon-based GDE was used to load synthesized  $\text{CuO}/\text{ZrO}_x$  and  $\text{CuO}$  catalysts at the same loading amount ( $0.5 \text{ mg cm}^{-2}$ ), so that a smaller amount of Cu was loaded into the  $\text{CuO}/\text{ZrO}_x$  compared to the bare  $\text{CuO}$  catalyst electrode. ICP OES analysis showed that the atomic ratio of Cu: Zr in  $\text{CuO}/\text{ZrO}_x$  was approximately 5:1 (Table S1). The total current density ( $j_{\text{total}}$ ) increased with the  $\text{ZrO}_x$  introduction, especially improving the

partial current density for  $\text{C}_2\text{H}_4$  production ( $j_{\text{C}_2\text{H}_4}$ ) by 1.76 times at an operating voltage of 4.0 V. The ethylene selectivities of  $\text{CuO}/\text{ZrO}_x$  and  $\text{CuO}$  at 4.0 V were 36.4% and 33.3%, respectively. The introduction of  $\text{ZrO}_x$  did not significantly affect product selectivity but showed a substantial improvement in total current density. To investigate the improvement in current density, EIS experiments were conducted (Figure S1).  $R_{\text{CT}}$  values of the  $\text{CuO}/\text{ZrO}_x$  and the  $\text{CuO}$  catalyst exhibited  $49.34 \Omega$  and  $58.66 \Omega$ , respectively. This indicates that the presence of  $\text{ZrO}_x$  lowers the charge transfer resistance, potentially accelerating the reaction rate.

Both catalysts showed similar FEs for hydrogen production over the various applied potentials. At the same time, mainly CO was produced at lower cell voltages ( $< 3.5 \text{ V}$ ), while higher cell voltage increased C-C coupling, enhancing FE for  $\text{C}_2+$  products. Although the FEs of ECR reaction products were similar for both catalysts,  $\text{ZrO}_x$  presence resulted in slight improvements in the FEs for  $\text{C}_2\text{H}_4$  and  $\text{C}_2\text{H}_5\text{OH}$  (Figures 1a and 1b). For comparison,  $\text{ZrO}_x$  was synthesized following the same method (Figure S2) and physically mixed with  $\text{CuO}$ , whose ECR of the simple mixture catalyst exhibited rather increased CO production and decreased C-C coupling both in FE and current density compared to  $\text{CuO}$  alone (Figure 1c). This suggests that the

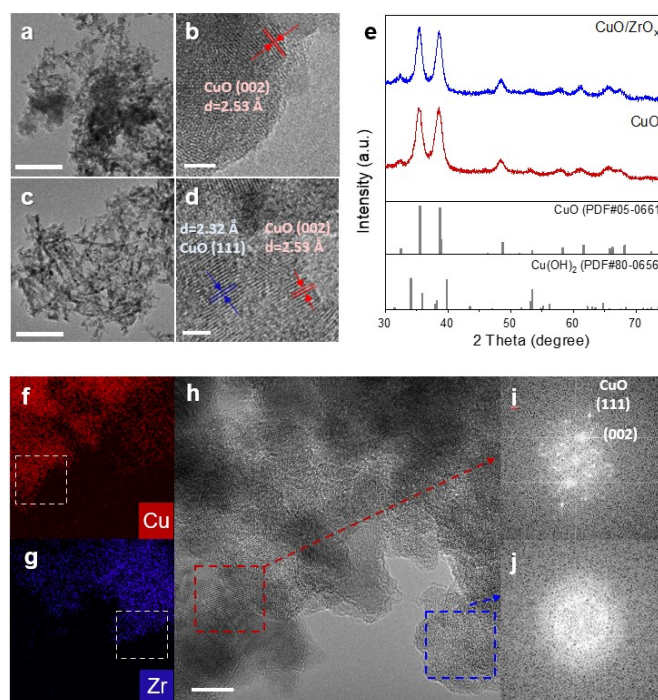

**Fig. 2** Characterizations of as-prepared  $\text{CuO}/\text{ZrO}_x$  and  $\text{CuO}$  catalysts. **a-b** (a) TEM, (b) HR-TEM image of  $\text{CuO}/\text{ZrO}_x$ . **c-d** (c) TEM, (d) HR-TEM image of  $\text{CuO}$ . **(e)** XRD patterns of  $\text{CuO}/\text{ZrO}_x$  and  $\text{CuO}$ . **f-j** (f), (g) TEM-EDS, (h) HR-TEM, (i), (j) FFT images of  $\text{CuO}/\text{ZrO}_x$ . Scale bars correspond to 200 nm in (a), (c), 2 nm in (b), (d), and 5 nm in (h).

C-C bonding. If  $\text{ZrO}_x$  is mixed and does not interact with Cu catalyst, it could increase the distance between Cu sites,



lowering  $C_{2+}$  formation efficiency and rather increasing CO selectivity. A significant performance improvement with Cu/ZrO<sub>x</sub> was obtained in total current density, enhancing partial current densities of C<sub>2</sub>H<sub>4</sub> and C<sub>2+</sub> products compared to bare CuO (Figures 1d and S3).

To further investigate the effect of ZrO<sub>x</sub>, we adjusted the amount of Zr introduced into the catalyst to 0.5 and 2 times (denoted as CuZrO-0.5 and CuZrO-2, respectively) and compared their ECR performances (Figure S4). The Cu: Zr ratio in CuO/ZrO<sub>x</sub> is controlled by the amount of added Zr precursor, and ICP analysis shows similar ratios in synthesized catalysts (Table S1). All Zr-incorporated catalysts showed a noticeable increase in current density compared to CuO. A cell voltage of 4.0 V achieved a total current density near 300 mA/cm<sup>2</sup>. The product distribution was influenced by Zr amounts, with CuO/ZrO<sub>x</sub> showing the highest  $j_{C_2H_4}$ . Although CuZrO-0.5 also increased  $j_{C_2H_4}$  compared to CuO, CuZrO-2 samples showed decreased C<sub>2</sub>H<sub>4</sub> selectivity and increased HER. This indicates that high ZrO<sub>x</sub> amounts lower ECR selectivity. The comparative experiments confirmed that when a suitable amount of ZrO<sub>x</sub> was introduced, the partial current density for C-C coupling was enhanced compared to the bare CuO.

### Characterization of CuO/ZrO<sub>x</sub>

Next, to understand the improved activity, we performed the material analysis of the catalysts before, during, and after the reaction. Material characterizations of as-prepared catalysts were conducted using TEM and XRD analyses, which exhibited that crystalline CuO and amorphous ZrO<sub>x</sub> nanostructures were well-dispersed, and ZrO<sub>x</sub> was adjacent to CuO (Figure 2). As mentioned earlier, we incorporated ZrO<sub>x</sub> into copper oxides to verify ZrO<sub>x</sub> effects since various copper oxides such as Cu(OH)<sub>2</sub>, Cu<sub>2</sub>O, and CuO are known to induce active morphologies (e.g., grain boundaries) for C-C coupling when reduced to Cu during ECR.<sup>9-10</sup> Therefore, the CuO/ZrO<sub>x</sub> interface was introduced by sequential precipitation of Cu and Zr precursors and subsequent heat treatment. The CuO catalyst was prepared under the same synthesis and heat treatment conditions without Zr precursors. TEM images of CuO/ZrO<sub>x</sub> and CuO show the morphologies in Figures 2a-b, and 2c-d, respectively. The overall morphology of the two catalysts is similar (Figures 2a and 2c), with domains of small particles around 10 nm overlapping each other. The HRTEM images of both catalysts show the lattice fringes of 2.53 and 2.32 Å, corresponding to monoclinic CuO (002) and CuO (111), respectively. The selected area electron diffraction (SAED) patterns correspond to the ring pattern of the CuO crystal structure, but no significant features associated with the crystalline structure of ZrO<sub>2</sub> are observed (Figure S5).

**Fig. 3** Electronic structure characterization studies of CuO/ZrO<sub>x</sub> and CuO. (a) Cu 2p, (b) O 1s XPS spectra of CuO/ZrO<sub>x</sub> and CuO catalysts. (c) Zr 3d XPS spectrum of CuO/ZrO<sub>x</sub> catalyst. **d-e** *ex-situ* (d) Cu K-edge XANES and (e) EXAFS of CuO/ZrO<sub>x</sub> and CuO catalysts. **f-g** *ex-situ* (f) Zr K-edge XANES and (g) EXAFS of CuO/ZrO<sub>x</sub> catalyst.

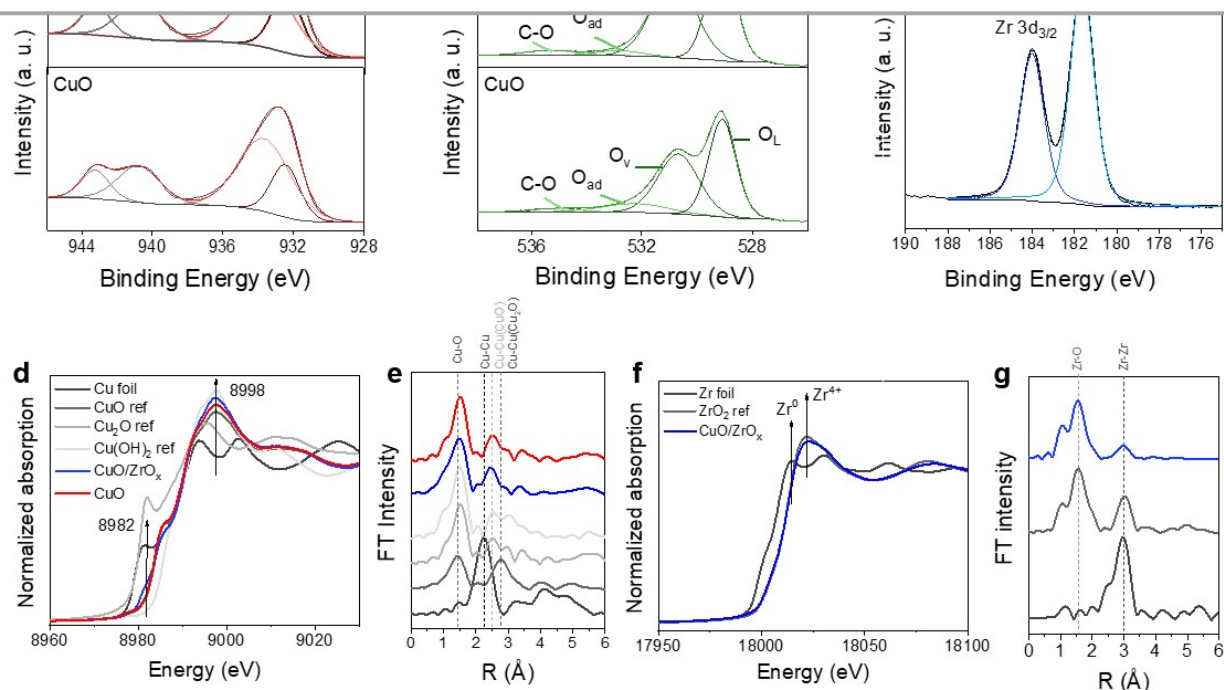

The XRD patterns are consistent with the TEM crystal analysis, having peaks associated with the monoclinic CuO (JCPDS card no. 05-0661) structure (Figure 2e). Additionally, the broad XRD patterns indicate small crystalline domains of CuO, consistent with the HRTEM image results. The same full width at half maximum (FWHM) in both catalysts indicates that the average size of the CuO domain is similar. Patterns corresponding to

$\text{Cu}(\text{OH})_2$  are not observed, indicating that the catalyst obtained after the calcination at  $200^\circ\text{C}$  has a  $\text{CuO}$  structure. The absence of additional peaks in  $\text{CuO}/\text{ZrO}_x$  compared to  $\text{CuO}$  points out the amorphous  $\text{ZrO}_x$  characteristics. This aligns with previous reports, which state that after Zr precipitation, annealing at high temperatures ( $> 300^\circ\text{C}$ ) yields tetragonal or monoclinic  $\text{ZrO}_2$  crystalline structures, while lower temperature tends to produce an amorphous structure.<sup>19</sup> Previous research reported that  $\text{CO}_2$  binds weaker to amorphous zirconia compared to crystalline zirconia.<sup>18</sup> This weaker binding might be favourable for our catalyst, as reversible adsorption and desorption of  $\text{CO}_2$  are desirable for conversion.

To further observe the distribution of elements within the particles, STEM EDS mapping images were obtained, revealing that Cu and Zr were well-dispersed (Figures 2f-h and S5). However, there are regions enriched in Cu (Figure 2f) and regions enriched in Zr (Figure 2g). The FFT images of the Cu-rich region display  $\text{CuO}$  patterns (Figure 2i), while the lack of characteristic patterns in the Zr-rich region supports the amorphous nature of  $\text{ZrO}_x$  (Figure 2j), consistent with the XRD results.

Next, the electronic states of  $\text{CuO}/\text{ZrO}_x$  and  $\text{CuO}$  were investigated using XPS and *ex-situ* XAS (Figure 3 and Figure S6). The high-resolution Cu 2p XPS spectra reveal that both as-prepared  $\text{CuO}/\text{ZrO}_x$  and  $\text{CuO}$  catalyst surfaces have similar oxidation states with a broad Cu  $2p_{3/2}$  signal. The deconvoluted features have characteristic binding energies at 932.3 eV and 933.6 eV, corresponding to  $\text{Cu}^{+0}$  and  $\text{Cu}^{2+}$ , respectively<sup>20</sup>, and their ratio is nearly identical in both catalysts. The Cu Auger spectra did not show distinct features corresponding to  $\text{Cu}^0$ , indicating that Cu 2p mainly comprises oxidized  $\text{Cu}^+$  or  $\text{Cu}^{2+}$  states (Figure S8).<sup>21</sup> The  $\text{Cu}^+$  species can be observable when the  $\text{CuO}$  surfaces have oxygen vacancies.<sup>22</sup> These Cu 2p XPS results showing the coexistence of  $\text{Cu}^+$  and  $\text{Cu}^{2+}$  indicate that our synthesized catalysts have defective surfaces. The O 1s XPS spectra exhibit a high proportion of oxygen vacancy ( $\text{O}_v$ ) features, and these vacancies are also obtained when  $\text{ZrO}_x$  is introduced in  $\text{CuO}$  (Figure 3b). Furthermore, the Zr 3d XPS spectrum of  $\text{Cu}/\text{ZrO}_x$  catalyst reveals the oxidation state of  $\text{Zr}^{4+}$  with the peaks at 184.0 eV and 181.4 eV, corresponding to the  $3d_{5/2}$  and  $3d_{3/2}$ , respectively (Figure 3c).<sup>23</sup> The XPS spectra also identify that the atomic ratio of Cu: Zr on the catalyst surface is 0.85:0.15, consistent with the ICP analysis result.

*Ex-situ* Cu K-edge XANES confirms that both catalysts predominantly exhibit the character of  $\text{CuO}$ , and the Zr introduction shows a minor spectral distortion (Figure 3d). The synthesized  $\text{CuO}$  catalyst features characteristic absorption signals at 8986 eV and 8998 eV, closely resembling the XANES of the  $\text{CuO}$  reference. These correspond to electron transfers from  $\text{Cu}^{2+} 1s \rightarrow 4p_{xy}$  and  $1s \rightarrow 4p_z$ , respectively, matching well with the monoclinic  $\text{CuO}$  which has a square planar structure with four oxygen coordination.<sup>24</sup> The edge-peak of  $\text{Cu}_2\text{O}$  at 8982 eV, indicative of  $\text{Cu}^+ 1s \rightarrow 4p_{xy}$  electron transfer,<sup>24</sup> was not observed in our synthesized  $\text{CuO}$  catalyst. This absence indicates  $\text{CuO}$  as the dominant structure in our synthesized catalyst. Interestingly, the Cu K-edge XANES spectrum of the  $\text{CuO}/\text{ZrO}_x$  catalyst shows a slight increase in the edge-peak at 8982 eV, while the edge-peak intensity at 8986 eV for  $\text{Cu}^{2+}$  decreases and the white-line peak intensity at 8998 eV for  $\text{Cu}^{2+}$  increases, compared to the  $\text{CuO}$  catalyst. This indicates that Zr introduction causes orbital distortion of Cu,<sup>25</sup> suggesting electronic interaction between adjacent Cu and Zr. The Cu K-edge EXAFS spectra show that the characteristic features of Cu-O and Cu-Cu in the synthesized catalyst are consistent with the  $\text{CuO}$  reference (Figure 3e). Meanwhile, the wavelet transform (WT) of the  $k^2$ -weighted Cu EXAFS spectra described in Figure S9, can provide radial distance and  $k$ -space resolution, clearly reflecting structural information. This enables precise identification of structural details around different atoms in complex mixed structures.<sup>26,27</sup> The WT intensity peaks at the expected positions for heavy atoms such as Zr and Cu ( $6\text{-}8 \text{ \AA}^{-1}$ ) are absent, indicating that Cu-related bonds in the  $\text{CuO}/\text{ZrO}_x$  catalyst are Cu-O and Cu-Cu, with no evidence of Cu-Zr bonds.<sup>28</sup> Additionally, the Zr K-edge XANES and EXAFS spectra show that the Zr species in the as-prepared  $\text{CuO}/\text{ZrO}_x$  catalyst exhibit characteristic signals closely matching those of  $\text{ZrO}_2$  (Figure 3f-g). These various material characterization results show that the synthesized  $\text{CuO}/\text{ZrO}_x$  catalyst consists of a mixture of  $\text{CuO}$

**Fig. 4** Evolution of the XAS under ECR in the MEA cell. *In-situ* (a) Cu K-edge XANES, (b) EXAFS of  $\text{CuO}/\text{ZrO}_x$  and  $\text{CuO}$  catalysts in the MEA cell. *In-situ* (c) Zr K-edge XANES spectra and (d) Zr K-edge *in-situ* EXAFS spectra of  $\text{CuO}/\text{ZrO}_x$  in the MEA cell.

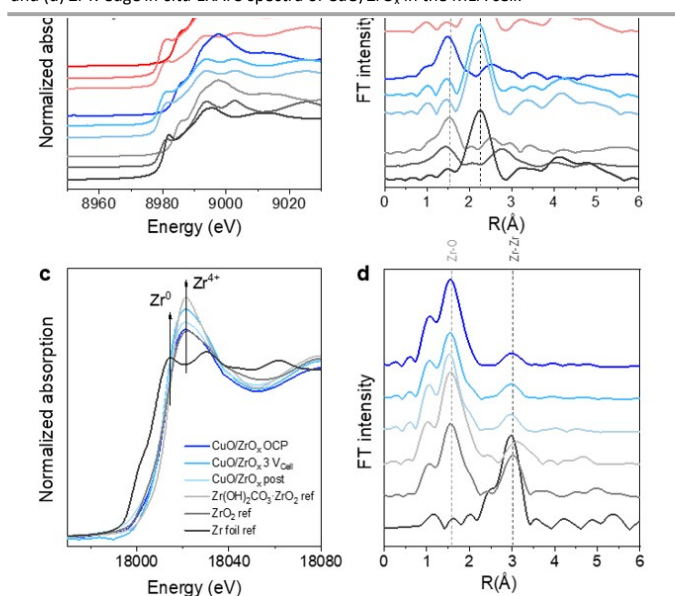

nanocrystals and amorphous  $\text{ZrO}_2$ , well-dispersed and adjacent to each other.

### *In-situ/operando* studies of $\text{CuO}/\text{ZrO}_x$ in MEA

It is well known that the state of the active Cu site during the ECR has a significant effect on determining C-C coupling activity.<sup>9</sup> To investigate the correlation between the electronic state of Cu-based catalysts and their ECR activity, *in-situ/operando* XAS experiments were performed with the MEA electrolyzer. The Cu K-edge XANES spectra show that the CuO state is maintained in both  $\text{CuO}/\text{ZrO}_x$  and CuO under open circuit potential (OCP) conditions in the MEA. However, when a negative potential is applied, the Cu K-edge XANES of both catalysts transforms to the  $\text{Cu}^0$  state (Figure 4a). Consistently, the characteristic peaks of the Cu K-edge EXAFS spectra of  $\text{CuO}/\text{ZrO}_x$  and CuO exhibit a feature corresponding to the Cu-O bond under OCP, which shifts to Cu-Cu bonds upon *operando* ECR condition (Figure 4b). The identical Cu states for both catalysts under *operando* conditions show that Cu is sufficiently reduced, and Zr does not significantly influence the electronic states of Cu during the ECR. The reduction of copper oxide to  $\text{Cu}^0$  during the ECR is well-studied.<sup>9,10</sup> In addition, the catalyst maintains the  $\text{Cu}^0$  state right after the ECR in the MEA, while the *ex-situ* samples show partial oxidation to  $\text{Cu}_2\text{O}$  according to Cu K-edge XANES due to air exposure (Figure S10). The evolution of  $\text{Cu}_2\text{O}$  after the ECR has been reported in copper oxide catalysts.<sup>10</sup> Consistently, XRD patterns of our catalysts show the disappearance of CuO peaks and the appearance of  $\text{Cu}_2\text{O}$  peaks (Figure S11), and HR-TEM images display lattice fringes corresponding to  $\text{Cu}_2\text{O}$  (Figure S12). Previous studies of Cu catalysts modified with metal oxide have reported that the metal oxide contributes to  $\text{C}_{2+}$  production by inducing a partial oxidation of Cu during ECR.<sup>29</sup> However, in our catalyst, we speculated that  $\text{ZrO}_x$  might have another role because the introduction of  $\text{ZrO}_x$  improves the current density without affecting Cu species during the reaction.

Although the introduction of Zr does not modulate the electronic state of Cu, *in-situ/operando* XAS of the Zr K-edge on  $\text{CuO}/\text{ZrO}_x$  are analyzed to investigate whether any chemical changes in Zr are involved during the ECR. At OCP, the catalysts maintained the  $\text{ZrO}_2$  state, consistent with *ex-situ* analysis. Notably, upon applying the cathodic potential, the white-line peak intensity of  $\text{Zr}^{4+}$  increases toward the XANES features of the  $\text{Zr}(\text{OH})_2\text{CO}_3\cdot\text{ZrO}_2$  reference (Figure 4c). When  $\text{CO}_2$  binds to the oxygen sites of zirconia, it can be adsorbed in the form of carbonate.<sup>17</sup> This suggests that  $\text{ZrO}_x$  can interact with  $\text{CO}_3^{2-}/\text{CO}_2$ , forming  $\text{Zr}(\text{OH})_2\text{CO}_3$  during the reaction. Zr EXAFS confirms that Zr species do not transform into metallic Zr under reduction potential, as the intensity of Zr-Zr bonds does not increase and the intensity of Zr-O bonds is preserved. The EXAFS spectra for the  $\text{Zr}(\text{OH})_2\text{CO}_3$  and  $\text{ZrO}_2$  references are nearly identical because carbon forms a bond through the oxygen of zirconia (Figure 4d). To investigate how the formation of zirconium carbonate can mediate the ECR activity enhancement, we additionally performed surface analysis of the post-ECR catalysts.

### Improved carbonate/ $\text{CO}_2$ affinity

The FT-IR spectra support that  $\text{CuO}/\text{ZrO}_x$  is notably carbonate-rich compared to CuO in the post-ECR samples (Figure 5a). As previously discussed (Figure S10-12),  $\text{Cu}_2\text{O}$  is formed when the two catalysts are exposed to air after ECR. The FT-IR spectra also show a peak at  $619\text{ cm}^{-1}$  corresponding to  $\text{Cu}_2\text{O}$ .<sup>30</sup> Both catalysts exhibit peaks at  $1395\text{ cm}^{-1}$ ,  $830\text{ cm}^{-1}$ , and  $702\text{ cm}^{-1}$ , representing the  $\nu_3$  asymmetric vibration mode,  $\nu_2$  asymmetric vibration mode, and  $\nu_4$  symmetric vibration mode of carbonate, respectively.<sup>31</sup> Relative to the  $\text{Cu}_2\text{O}$  peak intensity, the intensity of carbonate peaks is higher in the post-ECR  $\text{CuO}/\text{ZrO}_x$  catalyst than the post-ECR CuO, indicating that the Zr introduction enriches the catalyst surface with carbonate.

Meanwhile, TEM-EDS analysis on the post-ECR catalyst shows that Cu and Zr remain well interfaced after the reaction. In the post-ECR TEM-EDS images of  $\text{CuO}/\text{ZrO}_x$ , the purple region

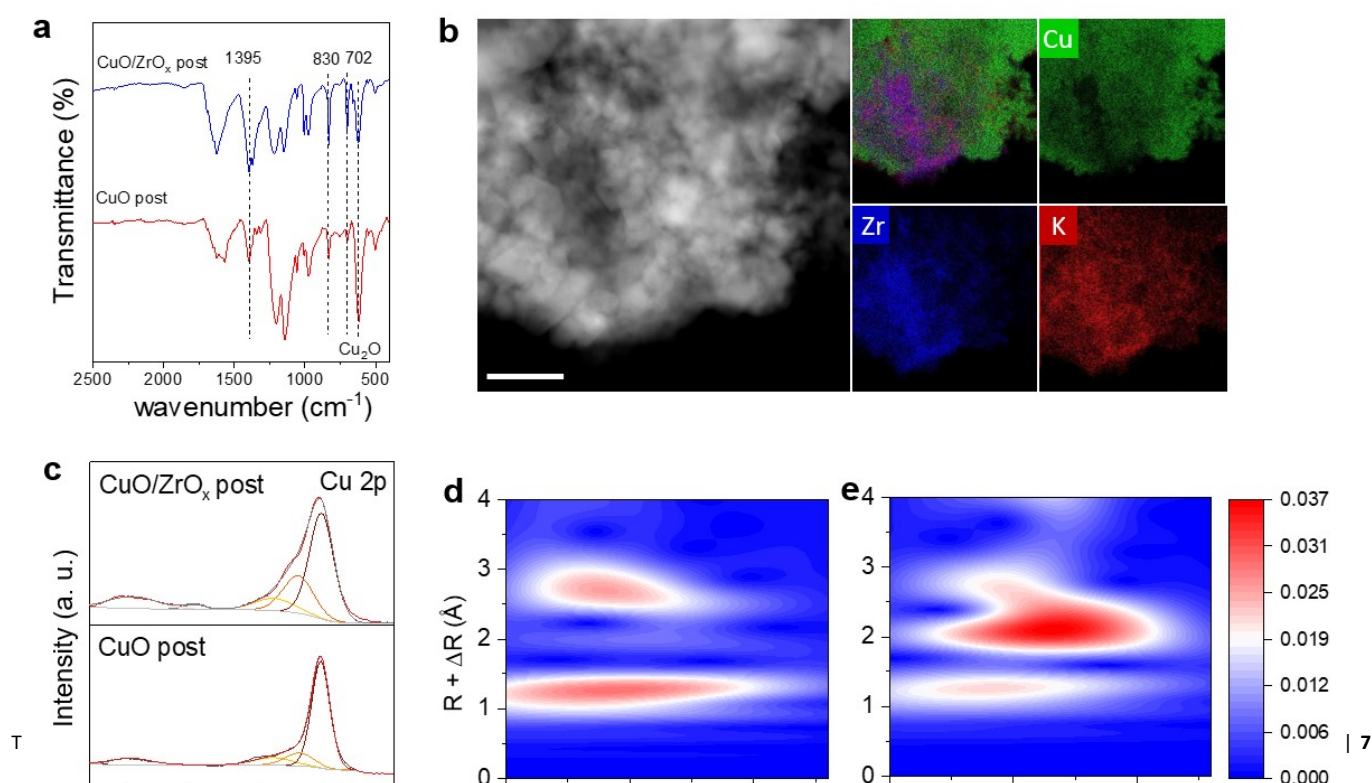

**Fig. 5.** (a) FT-IR spectra of  $\text{CuO}/\text{ZrO}_x$  and CuO catalysts post-ECR. (b) STEM-EDS images of the  $\text{CuO}/\text{ZrO}_x$  catalyst post-ECR. The image where green, blue, and red all appear is an overlay of the distributions of Cu, Zr, and K. (c) Cu 2p XPS spectra of  $\text{CuO}/\text{ZrO}_x$  and CuO catalysts post-ECR. (d-e) Wavelet transform spectra of (d)  $\text{CuO}/\text{ZrO}_x$  and (e) CuO post-ECR. Scale bars correspond to 100 nm in (b).



indicates the overlap of the blue (Zr) and red (K) distributions. There is a notable overlap between K and Zr distributions, while Cu shows an independent distribution from K, indicating a possible carbonate enrichment in the Zr-rich region (Figure 5b).

In contrast, the post-ECR TEM-EDS image of CuO shows a uniform distribution of Cu and K (Figure S13). The characteristic distribution of K can be attributed to the Lewis acid sites on Zr, which can draw carbonate and attract  $K^+$  from the electrolyte. These FT-IR and TEM analyses support that the introduction of Zr can enhance the carbonate affinity of the catalyst. Furthermore,  $CO_2$  Brunauer–Emmett–Teller (BET) measurements revealed that CuO/ZrO<sub>x</sub> has a 1.25 times higher  $CO_2$  adsorption capacity than CuO (Figure S14). CuO/ZrO<sub>x</sub> enhances the affinity not only for carbonate but also for  $CO_2$ .

Then, Cu 2p XPS analysis was performed on the post-ECR catalysts to investigate whether the abundant carbonate on the catalyst surface can also interact with Cu (Figure 5c and Figure S6c-d). Herein, both post-ECR CuO/ZrO<sub>x</sub> and CuO catalysts show significantly different Cu 2p XPS features than before the reaction (Figure 3a). Also, the peak intensity corresponding to the high binding energy is notably increased on the Zr-introduced catalyst. Both catalysts commonly exhibit a strong Cu<sup>+0</sup> feature at 932.3 eV, indicating the formation of a Cu/Cu<sub>2</sub>O mixture after ECR. In addition, Cu<sup>2+</sup> features are identified at 933.6 eV and 935.1 eV, corresponding to CuO and Cu(OH)<sub>2</sub>/CO<sub>3</sub>, respectively.<sup>20,32</sup> Although the 932.3 eV peak is the major feature for both catalysts, the relative peak intensity of the Cu<sup>2+</sup> species is higher on the CuO/ZrO<sub>x</sub> surface, suggesting that the carbonate-abundant surface promotes Cu<sup>2+</sup> species formation after ECR. Scheme S2 suggests that Cu sites interacting with carbonate form Cu<sup>2+</sup> species that can reversibly convert between CuCO<sub>3</sub> and CuO upon air exposure.<sup>33</sup> In contrast, in the absence of carbonate, it has been reported that metallic Cu sites transform into a Cu<sub>2</sub>O layer when exposed to air. Thus, the CuO/ZrO<sub>x</sub> catalyst with a carbonate-rich surface exhibits relatively large Cu<sup>2+</sup> peaks compared to the Cu<sup>+0</sup> peak. Meanwhile, the CuO catalyst with a carbonate-poor surface appears to have metallic Cu and Cu<sub>2</sub>O as the major species after the reaction. *Ex-situ* Cu K-edge EXAFS analysis reinforces them, showing major Cu-Cu bonds in post-ECR CuO catalyst and predominant Cu-O bonds in post-CuO/ZrO<sub>x</sub> catalyst (Figure S10). XRD also shows a minor metallic Cu (200) peak at 50.4 degrees in the post-ECR CuO catalyst (Figure S11). The first-derivative maximum peaks of CuO post-ECR were slightly shifted compared to CuO/ZrO<sub>x</sub> post-ECR to lower energies, indicating a larger ratio of metallic Cu (Figure S15). This is also confirmed by the wavelet transformation of *ex-situ* Cu K-edge EXAFS (Figure 5d-e). The contour of CuO/ZrO<sub>x</sub> occupies one k-space at  $\sim 4 \text{ \AA}^{-1}$ , which is in good agreement with the Cu-Cu contour of copper oxides.<sup>34</sup> Meanwhile, the contour of the CuO catalyst occupies one k-space at  $\sim 7.0 \text{ \AA}^{-1}$ , which is well aligned with the Cu-Cu contour of Cu foil.<sup>34</sup> For both catalysts, a contour corresponding to Cu-O appears at  $\sim 4 \text{ \AA}^{-1}$ , and it is noteworthy that the contour of CuO/ZrO<sub>x</sub> is more skewed downward and occupies a larger area. Based on a previous report that CuCO<sub>3</sub> has a shorter first shell radius compared to Cu<sub>2</sub>O and CuO,<sup>35</sup> the downward expansion of the contour in the wavelet

transformation image suggests that Cu surface is interacting with carbonate. Taken together, this suggests that the interaction of zirconium carbonate affects the adjacent Cu surface, resulting in a carbonate-rich environment after ECR.

We propose the following mechanism for the chemical transfer from ZrO<sub>x</sub> to Cu (Scheme 3). It has been reported that ZrO<sub>x</sub> can undergo the adsorption/desorption of  $CO_2$  by pressure swing at room temperature.<sup>17</sup> The carbonate formed on the zirconia surface can be reversibly desorbed into  $CO_2$  when the surrounding  $CO_2$  concentration decreases. Thus, ZrO<sub>x</sub> acts as a reservoir, adsorbing  $CO_2$  as carbonate and releasing it when the  $CO_2$  level on the neighbouring Cu surface drops due to  $CO_2$  consumption as a reactant during the ECR. The high carbonate/ $CO_2$  affinity of ZrO<sub>x</sub> can assist in supplying  $CO_2$  to the active sites during the reaction, contributing to an increase in ECR current density in our CuO/ZrO<sub>x</sub>. This characteristic is expected to be utilized in the design of high-performance ECR catalysts.

## Conclusions

In this study, we demonstrated the significant enhancement of ECR performance by incorporating amorphous zirconia into the CuO catalyst. CuO/ZrO<sub>x</sub> had a 1.76-fold increase in ethylene partial current density. Our findings from *in-situ/operando* XAS revealed that ZrO<sub>x</sub> interacts with carbonates during the ECR process. The ability of ZrO<sub>x</sub> to interact with carbonate is proposed to act as a reservoir that enhances C-C coupling activity by supplying  $CO_2$  reactant to the Cu surface. Post-reaction analysis confirmed that the presence of ZrO<sub>x</sub> leads to an enriched carbonate surface, promoting Cu<sup>2+</sup> species formation and enhancing the overall carbonate-mediated chemical interaction at the catalyst surface. The improved  $CO_2$  adsorption capacity of the CuO/ZrO<sub>x</sub> catalyst compared to bare CuO further supports the role of ZrO<sub>x</sub> in enhancing  $CO_2$  affinity and ECR performance. The integration of zirconia into Cu-based catalysts provides a promising strategy for enhancing the efficiency of electrochemical  $CO_2$  conversion. Beyond adjusting the oxidation state or forming grain boundaries, we suggest that combining foreign metal oxides can affect the catalyst interaction with carbonate/ $CO_2$  species and therefore propose a new route to improve ECR catalytic activity.

## Author contributions

D. K. designed and performed all experiments and write the manuscript. H. Y. conducted XAFS data fitting and WT data analysis. H. Y. and J. K. supported *in-situ/operando* XAS experiments. C. W. L. assisted in the synthetic approach and catalyst characterization. Y. J. H. supervised the project and write the manuscript. All authors contributed to the discussion of data and the edition of the manuscript.

## Conflicts of interest

The authors declare no competing financial interest.



## Data availability

The data supporting this article have been included as part of the Supplementary Information.

## Acknowledgments

This work was supported by the Samsung Advanced Institute of Technology (SAIT), and the authors gratefully acknowledged the insightful discussion and contribution of Kang Hee Cho, Noho Lee, Minkyung Kim, and Jaeeun Kim at Air Science Research Center, SAIT. This work was also supported by the “Carbon Upcycling Project for Platform Chemicals (No. 2022M3J3A10500533)” and the “DACU project” (No. RS-2023-00259920) of the National Research Foundation of Korea (NRF) grant funded by Ministry of Science and ICT, Republic of Korea. The authors acknowledge the support of the Creative Pioneering Researchers Program through Seoul National University.

## References

- S. Nitopi, E. Bertheussen, S. B. Scott, Xi. Liu, A. K. Engstfeld, S. Horch, B. Seger, I. E. L. Stephens, K. Chan, C. Hahn, J. K. Nørskov, T. F. Jaramillo and I. Chorkendorff, *Chem. Rev.*, 2019, **119**, 7610–7672.
- S. Garg, M. Li, A. Z. Weber, L. Ge, L. Li, V. Rudolph, G. Wang, and T. E. Rufford, *J. Mater. Chem. A.*, 2020, **8**, 1511–1544.
- R. G. Mariano, K. Mckelvey, H. S. White and M. W. Kanan, *Science*, 2017, **358**, 1187–1192.
- J. J. Lv, M. Jouny, W. Luc, W. Zhu, J. J. Zhu, and F. Jiao, *Adv. Mater.*, 2018, **30**, 1803111.
- W. Choi, Y. Choi, E. Choi, H. Yun, W. Jung, W. H. Lee, H. S. Oh, D. H. Won, J. Na, and Y. J. Hwang, *J. Mater. Chem. A*, 2022, **10** 10363–10372.
- K. P. Kuhl, T. Hatsukade, E. R. Cave, D. N. Abram, J. Kibsgaard and T. F. Jaramillo, *J. Am. Chem. Soc.*, 2014, **136**, 14107–14113.
- D. N. Celada, and A. S. Varela, *J. Mater. Chem. A*, 2022, **10**, 5899–5917.
- D. Gao, I. Zegkinoglou, N. J. Divins, f. Scholten, I. Sinew, P. Grosse, and B. R. Cuenya, *ACS Nano*, 2017, **11**, 4825–4831.
- C. Chen, X. Yan, Y. Wu, S. Liu, X. Sun, Q. Zhu, R. Feng, T. Wu, Q. Qian, H. Liu, L. Zheng, J. Zhang, and B. Han, *Chem. Sci.*, 2021, **12**, 5938–5943. A
- D. Ren, Y. Deng, A. D. Handoko, C. S. Chen, S. Malkhandi, and B. S. Yeo, *ACS Catal.*, 2015, **5**, 2814–2821.
- J. Li, A. Ozden, M. Wan, Y. Hu, F. Li, Y. Wang, R. R. Zamani, D. Ren, Z. Wang, Y. Xu, D. H. Nam, J. Wicks, B. Chen, X. Wang, M. Luo, M. Graetzel, F. Che, E. H. Sargent, and D. Sinton, *Nat. Commun.*, 2021, **12**, 1–10.
- H. Yun, W. Choi, D. Shin, H. S. Oh, and Y. J. Hwang, *ACS Catal.*, 2023, **13**, 9302–9312.
- C. P. O'Brien, R. K. Miao, S. Liu, Y. Xu, G. Lee, A. Robb, J. E. Huang, K. Xie, K. Bertens, C. M. Gabardo, J. P. Edwards, C. T. Dinh, E. H. Sargent, and D. Sinton, *ACS Energy Lett.*, 2021, **6**, 2952–2959.
- C. W. Lee, S. J. Shin, H. Jung, D. L. T. Nguyen, S. Y. Lee, W. H. Lee, D. H. Won, M. G. Kim, H. S. Oh, T. Jang, H. Kim, B. K. Min, and Y. J. Hwang, *ACS Energy Lett.*, 2019, **4**, 2241–2248.
- A. Xu, S. F. Hung, A. Cao, Z. Wang, N. Karmodak, J. E. Huang, Y. Yan, A. S. Rasouli, A. Ozden, F. Y. Wu, H. J. Tsai, T. J. Lee, F. Li, M. Luo, Y. Wang, X. Wang, J. Abed, Z. Wang, D. H. Nam, Y. C. Li, A. H. Ip, D. Sinton, C. Dong, and E. H. Sargent, *Nat. Catal.*, 2022, **5**, 1081–1088.
- X. Li, Q. Lium, J. Wang, D. Meng, Y. Shu, X. Lv, B. Zhao, H. Yang, T. Cheng, Q. Gao, L. Li, and H. B. Wu, *Chem*, 2022, **8**, 2148–2162.
- Y. Kamimura and A. Endo, *Phys. Chem. Chem. Phys.*, 2016, **8**, 2699–2709.
- T. Joutsuka and S. Tada, *J. Phys. Chem. C*, 2013, **117** 6998–7008.
- N. Scotti, F. Bossola, F. Zaccheria, and N. Ravasio, *Catalysts*, 2020, **10**, 168.
- N. S. McIntyre, and M. G. Cook, *Anal. Chem.*, 1975, **47**, 2208–2212.
- M. C. Biesinger, L. W. M. Lau, A. R. Gerson, and R. St. C. Smart, *Appl. Surf. Sci.*, 2010, **257**, 887–898.
- M. Shaw, D. Samanta, S. Bera, M. K. Mahto, M. A. S. Shaik, S. Konar, I. Mondal, D. Dhara, and A. Pathak, *Inorg. Chem.*, 2022, **61**, 14568–14581.
- J. L. Colón, D. S. Thakur, C. Y. Yang, A. Clearfield, and C. R. Martini, *J. Catal.*, 1990, **124**, 148–159.
- A. Gaur, and B. D. Shrivastava, *Acta Phys. Pol., A*, 2012, **121**, 647–652.
- W. Sun, Y. Song, X. Gong, L. Cao, and J. Yang, *Chem. Sci.*, 2015, **6**, 4993–4999.
- H. Funke, M. Chukalina, and A. Rossberg, *Phys. Scr.*, 2005, **115**, 232–234.
- J. Timoshenko, and A. Kuzmin, *Comput. Phys. Commun.*, 2009, **180**, 920–925.
- Y. W. Han, L. Ye, T. J. Gong, X. B. Lu, and Y. Fu, *Adv. Funct. Mater.*, 2024, **34**, 2315044.
- Z. Li, Z. Liu, S. Li, Y. Pei, D. Li, J. Mao, R. Zhou, C. Qiu, Y. Lu, and B. Zhang, *J. Mater. Chem. A*, 2024, **12**, 15082–15089.
- V. Sudha, G. Murugadoss, and R. Thangamuthu, *Sci. Rep.*, 2021, **11**, 3413.
- O. Seiferth, K. Wolter, B. Dillmann, G. Klivenyi, H. J. Freund, D. Scarano, and A. Zecchina, *Surf. Sci.*, 1999, **421**, 176–190.
- C. Zhu, A. Osherov, and M. J. Panzer, *Electrochim. Acta*, 2013, **111**, 771–778.
- W. N. R. W. Isahak, Z. A. C. Ramli, M. W. Ismail, K. Ismail, R. M. Yusop, M. W. M. Hisham, and M. A. Yarmo, *J. CO2 Util.*, 2013, **2**, 8–15.
- X. Wang, Q. Chen, Y. Zhu, K. Wang, Y. Chang, X. Wu, W. Bao, T. Cao, H. Chen, Y. Zhang, and H. Qin, *Signal Transduction Targeted Ther.*, 2023, **8**, 277.
- M. Burachevskaya, T. Minkina, S. Mandzhieva, T. Bauer, D. Nevidomskaya, V. Shuvaeva, S. Suchkova, R. Kizilkaya, C. Gülsler, and V. Rajput, *Environ. Geochem. Health*, 2021, **43**, 1655–1672.
